# Supplementary material for: Long-term neuroprotective effect of erythropoietin on executive functions in very preterm children (EpoKids): protocol of a prospective follow-up study
Source: PubMed Central journal article supplement — BMJ Open. 2018 Apr 24;8(4):e022157. doi: 10.1136/bmjopen-2018-022157 (PMC5922511; doi:10.1136/bmjopen-2018-022157), 2018-04-24
Supplement: bmjopen-2018-022157.reviewer_comments.pdf [file bmjopen-2018-022157.reviewer_comments.pdf]

## PEER REVIEW HISTORY

BMJ Open publishes all reviews undertaken for accepted manuscripts. Reviewers are asked to complete a checklist review form (<http://bmjopen.bmj.com/site/about/resources/checklist.pdf>) and are provided with free text boxes to elaborate on their assessment. These free text comments are reproduced below.

## ARTICLE DETAILS

|                            |                                                                                                                                                         |
|----------------------------|---------------------------------------------------------------------------------------------------------------------------------------------------------|
| <b>TITLE (PROVISIONAL)</b> | Long-term neuroprotective effect of erythropoetin on executive functions in very preterm children (EpoKids): protocol of a prospective follow up study  |
| <b>AUTHORS</b>             | Wehrle, Flavia; Held, Ulrike; Tuura, Ruth; Disselhoff, Vera; Schnider, Barbara; Fauchère, Jean-Claude; Huppi, Petra; Latal, Beatrice; Hagmann, Cornelia |

This article was not externally reviewed at BMJ Open. Protocols that have been independently assessed prior to submission to BMJ Open are usually fast-tracked to publication on the grounds that further substantial changes will not be possible. This independent assessment will usually be external, independent review for both a substantial grant award from a non-commercial or government funder and ethics approval.
